# Supplementary material
Source: ML conference proceedings conference paper supplement (https://openaccess.thecvf.com/content/WACV_2020/html/Gomes_Do_As_I_WACV_2020_paper.html)
Supplement: Supplementary file 1 [file Gomes_Do_As_I_WACV_2020_supplemental.pdf]

Archive with 3 entries (2 files):
- supplementary_material/
- supplementary_material/0396-supp.pdf
- supplementary_material/wacv2020.mp4
