# Supplementary material
Source: ML conference proceedings conference paper supplement (https://openaccess.thecvf.com/content/WACV_2020/html/Gomes_Do_As_I_WACV_2020_paper.html)
Supplement: Supplementary file 1 [file Gomes_Do_As_I_WACV_2020_supplemental.pdf › supplementary_material/0396-supp.pdf]

# Do As I Do: Transferring Human Motion and Appearance between Monocular Videos with Spatial and Temporal Constraints

Thiago L. Gomes<sup>1</sup>      Renato Martins<sup>1,2</sup>      João Ferreira<sup>1</sup>      Erickson R. Nascimento<sup>1</sup>  
<sup>1</sup>Universidade Federal de Minas Gerais (UFMG), Brazil      <sup>2</sup>INRIA, France  
`{thiagoluange, renato.martins, joaoferreira, erickson}@dcc.ufmg.br`

In this supplementary material, we provide auxiliary information about the implementation and visualizations of the retargeted video sequences presented in our WACV submission. We start by presenting in Section 1 additional face restoration results using the GAN proposed in the paper. And then, Section 2 shows some visualizations of retargeted sequences with different target characters. Please also have a look in the accompanying video for more visual qualitative results.

## 1. GAN Face Texture Restoration

Our generative adversarial network was trained during 300 epochs using an NVIDIA 1080 ti GPU. The network was trained from scratch with batch size 1. Weights were initialized from a Gaussian distribution with mean 0 and standard deviation 0.02. All images were resized to  $256 \times 256$ . Some additional face texture restoration of different characters, for this number of epochs, are shown in Figure 1. These restorations were not included in the paper due to space restrictions. All the presented face images were not seen during the training. As it can be observed from these results, the GAN clearly improved the texture details of different face features, for instance, the eyes region, nose and face contours.

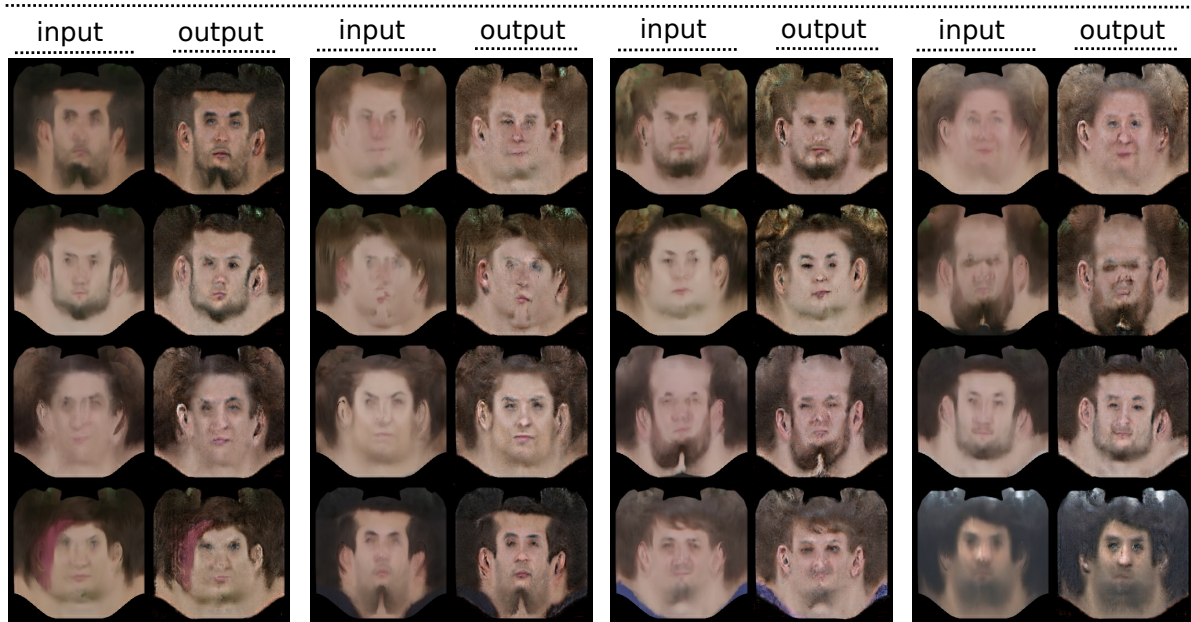

Figure 1: Samples of test set of our GAN to texture restoration. The odd columns show noisy images and the even columns show the enhanced face images.

## 2. Additional Visualizations of Retargeting Videos

In this section, we present additional retargeting examples using different target characters. These additional visualizations were omitted in the paper submission due to page space restrictions. As it can be noticed, for all retargeting frames illustrated in Figures 2 and 3, our technique generated the most plausible frames, containing less visual artifacts, while keeping the target characters' body shape and maintaining the motion restrictions, which were mostly located in the feet of the characters.

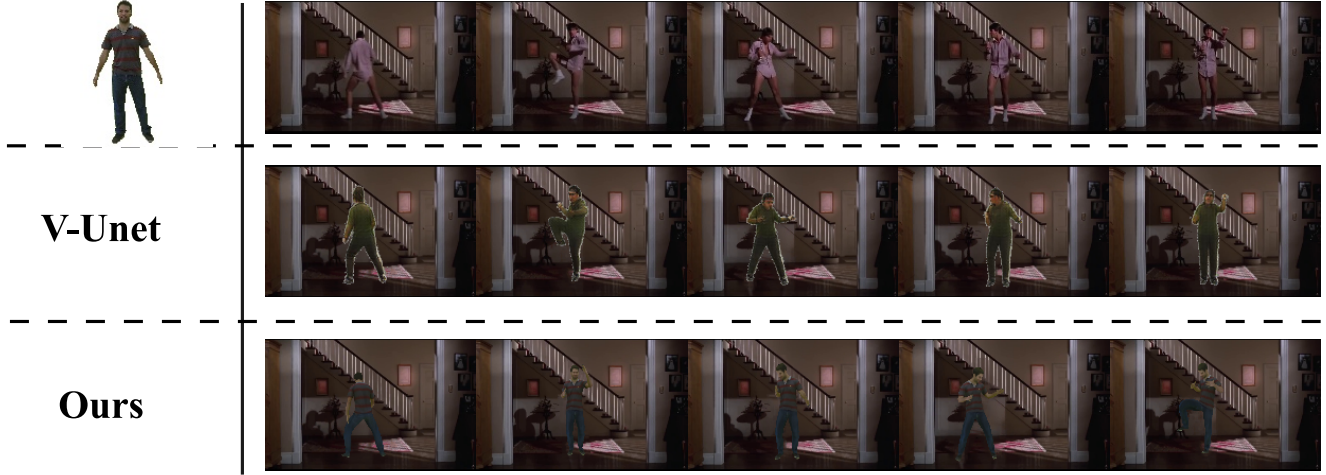

Figure 2: Qualitative retargeting samples using “**tom-cruise**” video sequence.

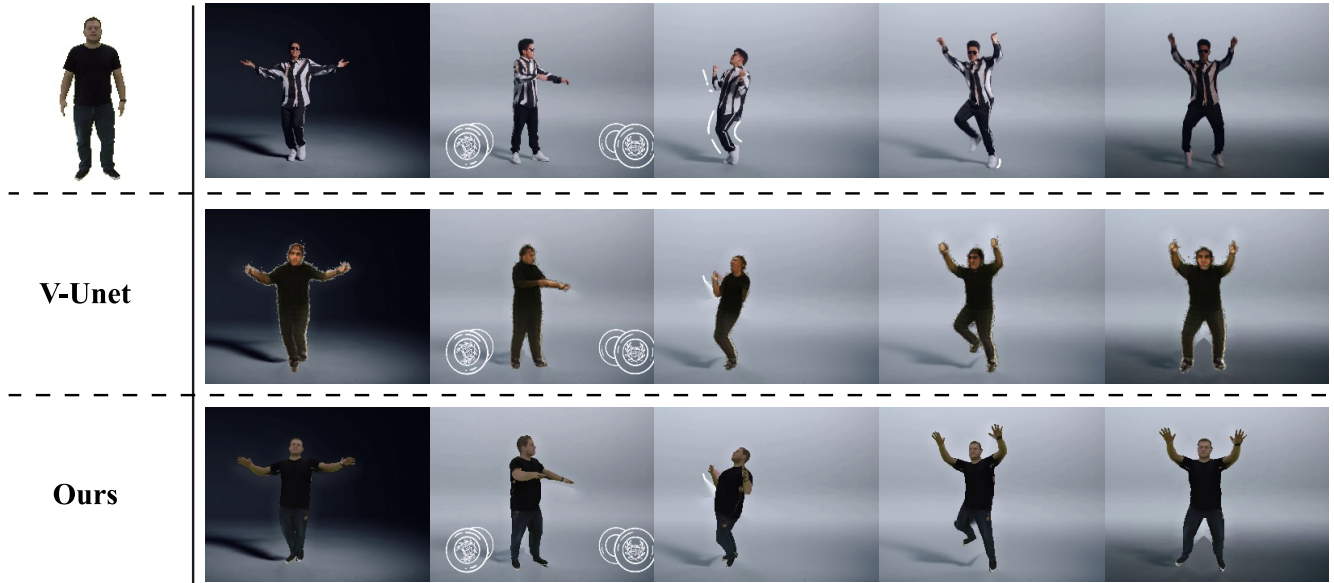

Figure 3: Qualitative retargeting results of an actor performing a movement from “**bruno-mars**” video sequence.
